# Supplementary material
Source: Springer Nature journal article supplement (https://www.springermedizin.de/resource/supplementary/12913_2013_2737_MOESM1_ESM.pdf/9531174)
Supplement: MOESM1 [file 9531174]

Additional file 1: Factors associated with prolonged LOS in men with prostate cancer undergoing radical prostatectomy in public hospitals. Total number of subjects, median, 10<sup>th</sup> and 90<sup>th</sup> percentiles, number and percent with prolonged LOS (n, %), crude and adjusted odds ratios (OR) with 95% confidence intervals (CI) and p-values

|                                      | LOS  |                |                                                 | LOS > 9 days (75 <sup>th</sup> percentile) |                 |           |                 |           |                      |
|--------------------------------------|------|----------------|-------------------------------------------------|--------------------------------------------|-----------------|-----------|-----------------|-----------|----------------------|
|                                      | N    | <sup>1</sup> M | <sup>2</sup> 10 <sup>th</sup> -90 <sup>th</sup> | n (%)                                      | <sup>3</sup> OR | 95% CI    | <sup>4</sup> OR | 95% CI    | <sup>5</sup> p-value |
| <b>Age at diagnosis</b>              |      |                |                                                 |                                            |                 |           |                 |           |                      |
| <55                                  | 353  | 7              | 6 - 12                                          | 76 (21.5)                                  | 0.86            | 0.62-1.60 | -               | -         |                      |
| 55-59                                | 460  | 8              | 6 - 12                                          | 111 (24.1)                                 | 1.00            | -         | -               | -         |                      |
| 60-64                                | 455  | 8              | 6 - 13                                          | 118 (25.9)                                 | 1.10            | 0.82-1.48 | -               | -         |                      |
| 65-69                                | 267  | 8              | 6 - 15                                          | 70 (26.2)                                  | 1.11            | 0.79-1.58 | -               | -         |                      |
| <b>Marital status</b>                |      |                |                                                 |                                            |                 |           |                 |           |                      |
| Married                              | 1268 | 8              | 6 - 12                                          | 287 (22.6)                                 | 1.00            | -         | 1.00            | -         | <i>p</i> <0.001      |
| Other                                | 263  | 8              | 6 - 15                                          | 87 (33.1)                                  | 1.69            | 1.27-2.25 | 1.71            | 1.25-2.34 |                      |
| <b>Smoking Status</b>                |      |                |                                                 |                                            |                 |           |                 |           |                      |
| Ever                                 | 521  | 8              | 6 - 13                                          | 122 (23.4)                                 | 0.87            | 0.67-1.14 | -               | -         |                      |
| Never                                | 686  | 8              | 6 - 13                                          | 178 (25.9)                                 | 1.0             | -         | -               | -         |                      |
| Unknown                              | 328  | 8              | 6 - 12                                          | 75 (22.8)                                  | 0.85            | 0.62-1.15 | -               | -         |                      |
| <b><sup>6</sup>Deprivation Index</b> |      |                |                                                 |                                            |                 |           |                 |           |                      |
| 1 (least deprived)                   | 400  | 8              | 6 - 11                                          | 82 (20.5)                                  | 1.00            | -         | -               | -         |                      |
| 2                                    | 193  | 8              | 6 - 12                                          | 41 (21.2)                                  | 1.05            | 0.69-1.59 | -               | -         |                      |
| 3                                    | 197  | 8              | 6 - 13                                          | 55 (27.9)                                  | 1.50            | 1.01-2.23 | -               | -         |                      |
| 4                                    | 246  | 8              | 6 - 14                                          | 61 (24.8)                                  | 1.28            | 0.88-1.87 | -               | -         |                      |
| 5 (most deprived)                    | 360  | 8              | 6 - 13                                          | 99 (27.5)                                  | 1.47            | 1.05-2.06 | -               | -         |                      |
| Unknown                              | 139  | 8              | 6 - 15                                          | 37 (26.6)                                  | 1.41            | 0.90-2.20 | -               | -         |                      |
| <b><sup>7</sup>Comorbidity</b>       |      |                |                                                 |                                            |                 |           |                 |           |                      |
| None                                 | 1127 | 8              | 6 - 12                                          | 242 (21.5)                                 | 1.00            | -         | 1.00            | -         | <i>p</i> <0.001      |
| Any                                  | 408  | 8              | 6 - 15                                          | 133 (32.6)                                 | 1.77            | 1.38-2.27 | 1.64            | 1.25-2.16 |                      |

Additional file 1 continued,

|                                    | LOS    |                |                                                 | LOS >9 days (75 <sup>th</sup> percentile) |                 |           |                 |           |                      |
|------------------------------------|--------|----------------|-------------------------------------------------|-------------------------------------------|-----------------|-----------|-----------------|-----------|----------------------|
|                                    | n=1535 | <sup>1</sup> M | <sup>2</sup> 10 <sup>th</sup> -90 <sup>th</sup> | n=375 (%)                                 | <sup>3</sup> OR | 95% CI    | <sup>4</sup> OR | 95% CI    | <sup>5</sup> p-value |
| <b>Grade/Gleason Score</b>         |        |                |                                                 |                                           |                 |           |                 |           |                      |
| Low/intermed (GS<=7)               | 1345   | 8              | 6 - 13                                          | 321 (23.9)                                | 1.00            | -         | -               | -         |                      |
| High (GS>7)                        | 147    | 8              | 6 - 14                                          | 39 (26.5)                                 | 1.15            | 0.78-1.70 | -               | -         |                      |
| Unknown                            | 43     | 8              | 6 - 16                                          | 15 (34.9)                                 | 1.71            | 0.90-3.24 | -               | -         |                      |
| <b>Stage</b>                       |        |                |                                                 |                                           |                 |           |                 |           |                      |
| Unknown                            | 1128   | 8              | 6 - 12                                          | 255 (22.6)                                | 1.00            | -         | 1.00            | -         | <i>p&lt;0.001</i>    |
| I & II                             | 285    | 8              | 6 - 16                                          | 75 (26.3)                                 | 1.22            | 0.91-1.65 | 1.38            | 0.99-1.92 |                      |
| III & IV                           | 122    | 8.5            | 6 - 14                                          | 45 (37.0)                                 | 2.00            | 1.35-2.96 | 2.19            | 1.44-3.34 |                      |
| <b>Patient status</b>              |        |                |                                                 |                                           |                 |           |                 |           |                      |
| Public                             | 618    | 8              | 6 - 13                                          | 145 (23.5)                                | 1.00            | -         | -               | -         |                      |
| Private                            | 805    | 7              | 6 - 12                                          | 176 (21.9)                                | 0.91            | 0.71-1.17 | -               | -         |                      |
| Unknown                            | 112    | 9              | 6 - 15                                          | 54 (48.2)                                 | 3.03            | 2.01-4.60 | -               | -         |                      |
| <b><sup>8</sup>Hospital volume</b> |        |                |                                                 |                                           |                 |           |                 |           |                      |
| Higher (>49)                       | 754    | 7              | 6 - 11                                          | 126(16.7)                                 | 0.43            | 0.34-0.55 | 0.34            | 0.26-0.45 | <i>p&lt;0.001</i>    |
| Lower (<=49)                       | 781    | 8              | 6 - 15                                          | 249 (31.9)                                | 1.00            | -         | 1.00            | -         |                      |
| <b><sup>9</sup>Surgeon volume</b>  |        |                |                                                 |                                           |                 |           |                 |           |                      |
| Higher (>17)                       | 750    | 8              | 6 - 11                                          | 161 (21.5)                                | 0.73            | 0.58-0.92 | 0.55            | 0.42-0.71 | <i>p&lt;0.001</i>    |
| Lower (<=17)                       | 785    | 8              | 6 - 14                                          | 214 (27.3)                                | 1.00            | -         | 1.00            | -         |                      |

<sup>1</sup>median, <sup>2</sup>10<sup>th</sup> and 90<sup>th</sup> percentiles, <sup>3</sup>unadjusted odds ratio, <sup>4</sup>adjusted odds ratio for variables shown; model also adjusted for year of surgery, <sup>5</sup>global p-values from likelihood ratio tests, <sup>6</sup>SAHRU 2002 index, <sup>7</sup>count of morbidities included in the Elixhauser index on HIPE record of RP episode, <sup>8</sup>median number of RPs performed at hospital per year, <sup>9</sup>median number of RP performed by surgeon per year in public and private hospitals
